# Supplementary material for: Rising plasminogen activator inhibitor-1 and hypoadiponectinemia characterize the cardiometabolic biomarker profile of women with recent gestational diabetes
Source: Springer Nature journal article supplement (doi:10.1186/s12933-018-0776-y), 2018-10-09
Supplement: MOESM1 [file 16185948]

**Table S1:** Multiple linear regression of (dependent variable) change in PAI-1 from 1- to 3-years adjusted for age, ethnicity, family history of diabetes, BMI at 1-year, duration of breastfeeding, glucose intolerance at 1-year, previous gestational glucose tolerance status, and the concurrent change in fasting insulin (**Panel A**) or triglycerides (**Panel B**)

**Panel A:**

| <u>Variables in model</u>     | <u>Beta</u> | <u>t</u> | <u>P</u> |
|-------------------------------|-------------|----------|----------|
| Age                           | 17.97186    | 1.56     | 0.12     |
| Asian ethnicity               | -90.75315   | -0.59    | 0.56     |
| Non-white non-Asian ethnicity | 22.46827    | 0.16     | 0.87     |
| Family history of diabetes    | -138.3005   | -1.37    | 0.17     |
| BMI at 1-year                 | -4.54252    | -0.45    | 0.65     |
| Duration of breastfeeding     | 6.633913    | 0.64     | 0.52     |
| Glucose intolerance at 1-year | 47.93762    | 0.35     | 0.72     |
| GDM                           | 412.2271    | 2.94     | 0.0036   |
| GIGT                          | 333.7635    | 2.09     | 0.037    |
| Abnormal GCT NGT in pregnancy | 162.9566    | 1.19     | 0.24     |
| Change in fasting insulin     | 0.677118    | 0.47     | 0.64     |

**Panel B:**

| <u>Variables in model</u>     | <u>Beta</u> | <u>t</u> | <u>P</u> |
|-------------------------------|-------------|----------|----------|
| Age                           | 12.71499    | 1.11     | 0.27     |
| Asian ethnicity               | -53.35009   | -0.35    | 0.73     |
| Non-white non-Asian ethnicity | 52.73081    | 0.39     | 0.70     |
| Family history of diabetes    | -126.3989   | -1.27    | 0.21     |
| BMI at 1-year                 | -1.58756    | -0.16    | 0.88     |
| Duration of breastfeeding     | 7.182945    | 0.70     | 0.49     |
| Glucose intolerance at 1-year | 59.3471     | 0.44     | 0.66     |
| GDM                           | 405.5285    | 2.94     | 0.0036   |
| GIGT                          | 298.3018    | 1.88     | 0.06     |
| Abnormal GCT NGT in pregnancy | 128.9917    | 0.95     | 0.34     |
| Change in triglycerides       | 50.40535    | 0.44     | 0.66     |
